# Supplementary material for: A computational lens into how music characterizes genre in film
Source: PLoS One. 2021 Apr 8;16(4):e0249957. doi: 10.1371/journal.pone.0249957 (PMC8031455; doi:10.1371/journal.pone.0249957)
Supplement: S1 Data — (ZIP) [file pone.0249957.s004.zip]

Archive with 227 entries (227 files):
- Appendix_S1_110_Film_Corpus.pdf
- data_explorer_example.ipynb
- film_genre_master_list.csv
- low_level_visual_data/300_rise_of_an_empire_brightness.npy
- low_level_visual_data/300_rise_of_an_empire_contrast.npy
- low_level_visual_data/aladdin_brightness.npy
- low_level_visual_data/aladdin_contrast.npy
- low_level_visual_data/alita_battle_angel_brightness.npy
- low_level_visual_data/alita_battle_angel_contrast.npy
- low_level_visual_data/annabelle_brightness.npy
- low_level_visual_data/annabelle_contrast.npy
- low_level_visual_data/antman_and_the_wasp_brightness.npy
- low_level_visual_data/antman_and_the_wasp_contrast.npy
- low_level_visual_data/antman_brightness.npy
- low_level_visual_data/antman_contrast.npy
- low_level_visual_data/aquaman_brightness.npy
- low_level_visual_data/aquaman_contrast.npy
- low_level_visual_data/avengers_age_of_ultron_brightness.npy
- low_level_visual_data/avengers_age_of_ultron_contrast.npy
- low_level_visual_data/avengers_endgame_brightness.npy
- low_level_visual_data/avengers_endgame_contrast.npy
- low_level_visual_data/avengers_infinity_war_brightness.npy
- low_level_visual_data/avengers_infinity_war_contrast.npy
- low_level_visual_data/beauty_and_the_beast_brightness.npy
- low_level_visual_data/beauty_and_the_beast_contrast.npy
- low_level_visual_data/black_mass_brightness.npy
- low_level_visual_data/black_mass_contrast.npy
- low_level_visual_data/blended_brightness.npy
- low_level_visual_data/blended_contrast.npy
- low_level_visual_data/bohemian_rhapsody_brightness.npy
- low_level_visual_data/bohemian_rhapsody_contrast.npy
- low_level_visual_data/captain_america_civil_war_brightness.npy
- low_level_visual_data/captain_america_civil_war_contrast.npy
- low_level_visual_data/captain_america_the_winter_soldier_brightness.npy
- low_level_visual_data/captain_america_the_winter_soldier_contrast.npy
- low_level_visual_data/captain_marvel_brightness.npy
- low_level_visual_data/captain_marvel_contrast.npy
- low_level_visual_data/chappaquiddick_brightness.npy
- low_level_visual_data/chappaquiddick_contrast.npy
- low_level_visual_data/christopher_robin_brightness.npy
- low_level_visual_data/christopher_robin_contrast.npy
- low_level_visual_data/cinderella_brightness.npy
- low_level_visual_data/cinderella_contrast.npy
- low_level_visual_data/collateral_beauty_brightness.npy
- low_level_visual_data/collateral_beauty_contrast.npy
- low_level_visual_data/crazy_rich_asians_brightness.npy
- low_level_visual_data/crazy_rich_asians_contrast.npy
- low_level_visual_data/creed_brightness.npy
- low_level_visual_data/creed_contrast.npy
- low_level_visual_data/doctor_strange_brightness.npy
- low_level_visual_data/doctor_strange_contrast.npy
- low_level_visual_data/dora_and_the_lost_city_of_gold_brightness.npy
- low_level_visual_data/dora_and_the_lost_city_of_gold_contrast.npy
- low_level_visual_data/dumb_and_dumber_to_brightness.npy
- low_level_visual_data/dumb_and_dumber_to_contrast.npy
- low_level_visual_data/dunkirk_brightness.npy
- low_level_visual_data/dunkirk_contrast.npy
- low_level_visual_data/edge_of_tomorrow_brightness.npy
- low_level_visual_data/edge_of_tomorrow_contrast.npy
- low_level_visual_data/entourage_brightness.npy
- low_level_visual_data/entourage_contrast.npy
- low_level_visual_data/first_man_brightness.npy
- low_level_visual_data/first_man_contrast.npy
- low_level_visual_data/focus_brightness.npy
- low_level_visual_data/focus_contrast.npy
- low_level_visual_data/geostorm_brightness.npy
- low_level_visual_data/geostorm_contrast.npy
- low_level_visual_data/going_in_style_brightness.npy
- low_level_visual_data/going_in_style_contrast.npy
- low_level_visual_data/halloween_2018_brightness.npy
- low_level_visual_data/halloween_2018_contrast.npy
- low_level_visual_data/happy_death_day_brightness.npy
- low_level_visual_data/happy_death_day_contrast.npy
- low_level_visual_data/hitman_agent_47_brightness.npy
- low_level_visual_data/hitman_agent_47_contrast.npy
- low_level_visual_data/horrible_bosses_2_brightness.npy
- low_level_visual_data/horrible_bosses_2_contrast.npy
- low_level_visual_data/house_with_a_clock_in_its_walls_brightness.npy
- low_level_visual_data/house_with_a_clock_in_its_walls_contrast.npy
- low_level_visual_data/how_to_be_single_brightness.npy
- low_level_visual_data/how_to_be_single_contrast.npy
- low_level_visual_data/in_the_heart_of_the_sea_brightness.npy
- low_level_visual_data/in_the_heart_of_the_sea_contrast.npy
- low_level_visual_data/incredibles_2_brightness.npy
- low_level_visual_data/incredibles_2_contrast.npy
- low_level_visual_data/interstellar_brightness.npy
- low_level_visual_data/interstellar_contrast.npy
- low_level_visual_data/into_the_woods_brightness.npy
- low_level_visual_data/into_the_woods_contrast.npy
- low_level_visual_data/it_chapter_two_brightness.npy
- low_level_visual_data/it_chapter_two_contrast.npy
- low_level_visual_data/johnny_english_strikes_again_brightness.npy
- low_level_visual_data/johnny_english_strikes_again_contrast.npy
- low_level_visual_data/jumanji_welcome_to_the_jungle_brightness.npy
- low_level_visual_data/jumanji_welcome_to_the_jungle_contrast.npy
- low_level_visual_data/jupiter_ascending_brightness.npy
- low_level_visual_data/jupiter_ascending_contrast.npy
- low_level_visual_data/justice_league_brightness.npy
- low_level_visual_data/justice_league_contrast.npy
- low_level_visual_data/king_arthur_legend_of_the_sword_brightness.npy
- low_level_visual_data/king_arthur_legend_of_the_sword_contrast.npy
- low_level_visual_data/kingsman_the_secret_service_brightness.npy
- low_level_visual_data/kingsman_the_secret_service_contrast.npy
- low_level_visual_data/kong_skull_island_brightness.npy
- low_level_visual_data/kong_skull_island_contrast.npy
- low_level_visual_data/krampus_brightness.npy
- low_level_visual_data/krampus_contrast.npy
- low_level_visual_data/lights_out_brightness.npy
- low_level_visual_data/lights_out_contrast.npy
- low_level_visual_data/mad_max_fury_road_brightness.npy
- low_level_visual_data/mad_max_fury_road_contrast.npy
- low_level_visual_data/magic_mike_xxl_brightness.npy
- low_level_visual_data/magic_mike_xxl_contrast.npy
- low_level_visual_data/maleficent_brightness.npy
- low_level_visual_data/maleficent_contrast.npy
- low_level_visual_data/me_before_you_brightness.npy
- low_level_visual_data/me_before_you_contrast.npy
- low_level_visual_data/megan_leavey_brightness.npy
- low_level_visual_data/megan_leavey_contrast.npy
- low_level_visual_data/miss_peregrines_home_for_peculiar_children_brightness.npy
- low_level_visual_data/miss_peregrines_home_for_peculiar_children_contrast.npy
- low_level_visual_data/mission_impossible_fallout_brightness.npy
- low_level_visual_data/mission_impossible_fallout_contrast.npy
- low_level_visual_data/mission_impossible_rogue_nation_brightness.npy
- low_level_visual_data/mission_impossible_rogue_nation_contrast.npy
- low_level_visual_data/moonlight_brightness.npy
- low_level_visual_data/moonlight_contrast.npy
- low_level_visual_data/mortal_engines_brightness.npy
- low_level_visual_data/mortal_engines_contrast.npy
- low_level_visual_data/murder_on_the_orient_express_brightness.npy
- low_level_visual_data/murder_on_the_orient_express_contrast.npy
- low_level_visual_data/need_for_speed_brightness.npy
- low_level_visual_data/need_for_speed_contrast.npy
- low_level_visual_data/oceans_8_brightness.npy
- low_level_visual_data/oceans_8_contrast.npy
- low_level_visual_data/paddington_2_brightness.npy
- low_level_visual_data/paddington_2_contrast.npy
- low_level_visual_data/pan_brightness.npy
- low_level_visual_data/pan_contrast.npy
- low_level_visual_data/parasite_brightness.npy
- low_level_visual_data/parasite_contrast.npy
- low_level_visual_data/pet_sematary_brightness.npy
- low_level_visual_data/pet_sematary_contrast.npy
- low_level_visual_data/pirates_of_the_caribbean_dead_men_tell_no_tales_brightness.npy
- low_level_visual_data/pirates_of_the_caribbean_dead_men_tell_no_tales_contrast.npy
- low_level_visual_data/pokemon_detective_pikachu_brightness.npy
- low_level_visual_data/pokemon_detective_pikachu_contrast.npy
- low_level_visual_data/queen_of_katwe_brightness.npy
- low_level_visual_data/queen_of_katwe_contrast.npy
- low_level_visual_data/rambo_last_blood_brightness.npy
- low_level_visual_data/rambo_last_blood_contrast.npy
- low_level_visual_data/rampage_brightness.npy
- low_level_visual_data/rampage_contrast.npy
- low_level_visual_data/ready_player_one_brightness.npy
- low_level_visual_data/ready_player_one_contrast.npy
- low_level_visual_data/run_all_night_brightness.npy
- low_level_visual_data/run_all_night_contrast.npy
- low_level_visual_data/san_andreas_brightness.npy
- low_level_visual_data/san_andreas_contrast.npy
- low_level_visual_data/shazam_brightness.npy
- low_level_visual_data/shazam_contrast.npy
- low_level_visual_data/sicario_brightness.npy
- low_level_visual_data/sicario_contrast.npy
- low_level_visual_data/smallfoot_brightness.npy
- low_level_visual_data/smallfoot_contrast.npy
- low_level_visual_data/solo_a_star_wars_story_brightness.npy
- low_level_visual_data/solo_a_star_wars_story_contrast.npy
- low_level_visual_data/spotlight_brightness.npy
- low_level_visual_data/spotlight_contrast.npy
- low_level_visual_data/star_trek_beyond_brightness.npy
- low_level_visual_data/star_trek_beyond_contrast.npy
- low_level_visual_data/star_wars_the_force_awakens_brightness.npy
- low_level_visual_data/star_wars_the_force_awakens_contrast.npy
- low_level_visual_data/star_wars_the_last_jedi_brightness.npy
- low_level_visual_data/star_wars_the_last_jedi_contrast.npy
- low_level_visual_data/stuber_brightness.npy
- low_level_visual_data/stuber_contrast.npy
- low_level_visual_data/suicide_squad_brightness.npy
- low_level_visual_data/suicide_squad_contrast.npy
- low_level_visual_data/sully_brightness.npy
- low_level_visual_data/sully_contrast.npy
- low_level_visual_data/tammy_brightness.npy
- low_level_visual_data/tammy_contrast.npy
- low_level_visual_data/teen_titans_go_to_the_movies_brightness.npy
- low_level_visual_data/teen_titans_go_to_the_movies_contrast.npy
- low_level_visual_data/the_boy_brightness.npy
- low_level_visual_data/the_boy_contrast.npy
- low_level_visual_data/the_conjuring_2_brightness.npy
- low_level_visual_data/the_conjuring_2_contrast.npy
- low_level_visual_data/the_hustle_brightness.npy
- low_level_visual_data/the_hustle_contrast.npy
- low_level_visual_data/the_imitation_game_brightness.npy
- low_level_visual_data/the_imitation_game_contrast.npy
- low_level_visual_data/the_intern_brightness.npy
- low_level_visual_data/the_intern_contrast.npy
- low_level_visual_data/the_judge_brightness.npy
- low_level_visual_data/the_judge_contrast.npy
- low_level_visual_data/the_legend_of_tarzan_brightness.npy
- low_level_visual_data/the_legend_of_tarzan_contrast.npy
- low_level_visual_data/the_man_from_uncle_brightness.npy
- low_level_visual_data/the_man_from_uncle_contrast.npy
- low_level_visual_data/the_meg_brightness.npy
- low_level_visual_data/the_meg_contrast.npy
- low_level_visual_data/the_peanut_butter_falcon_brightness.npy
- low_level_visual_data/the_peanut_butter_falcon_contrast.npy
- low_level_visual_data/the_post_brightness.npy
- low_level_visual_data/the_post_contrast.npy
- low_level_visual_data/this_is_where_i_leave_you_brightness.npy
- low_level_visual_data/this_is_where_i_leave_you_contrast.npy
- low_level_visual_data/thor_ragnarok_brightness.npy
- low_level_visual_data/thor_ragnarok_contrast.npy
- low_level_visual_data/tolkien_brightness.npy
- low_level_visual_data/tolkien_contrast.npy
- low_level_visual_data/tomorrowland_brightness.npy
- low_level_visual_data/tomorrowland_contrast.npy
- low_level_visual_data/transcendence_brightness.npy
- low_level_visual_data/transcendence_contrast.npy
- low_level_visual_data/vacation_brightness.npy
- low_level_visual_data/vacation_contrast.npy
- low_level_visual_data/venom_brightness.npy
- low_level_visual_data/venom_contrast.npy
- low_level_visual_data/wonder_woman_brightness.npy
- low_level_visual_data/wonder_woman_contrast.npy
- mir_feature_names.csv
- mir_features_dictionary.npy
- README.txt
- vggish_features_dictionary.npy
