# Supplementary material for: A computational lens into how music characterizes genre in film
Source: PLoS One. 2021 Apr 8;16(4):e0249957. doi: 10.1371/journal.pone.0249957 (PMC8031455; doi:10.1371/journal.pone.0249957)
Supplement: S1 Data — (ZIP) [file pone.0249957.s004.zip › data_explorer_example.ipynb]

# %% [markdown]
### Data Explorer
The purpose of this file is to demonstrate how to access all of the data contained in this dataset release.

# %% [markdown]
#### film_genre_master_list.csv
The film genre master list is a simple mapping between each film in our dataset and the tagged genres (sourced from imdb.com). The first column contains the film name, the second column contains *all* of the multi-tag genres from IMDb, and the third column contains the sub-set of genres from the second column that intersect with the set of 6 genres we analyzed in this study: {action, comedy, drama, horror, romance, sci-fi}.

# %% [code]
import csv
# Load in film_genre_master_list
film_to_genre = {}
with open("film_genre_master_list.csv", "r") as f:
    csv_reader = csv.reader(f, delimiter=',')
    for row in csv_reader:
        film_to_genre[row[0]] = row[2]

# %% [code]
film = "avengers_endgame"
print("The genre(s) of '{}' is/are '{}'.".format(film, film_to_genre[film]))

# %% [markdown]
#### Musical features (MIR, VGGish)

The MIR feature dictionary and VGGish feature dictionary carry all processed data for all films for the MIR and VGGish features we extracted, respectively.

70 MIR features were extracted at a variety of samplerates based on previous literature (see paper for details), then summarized by mean and standard deviation (bringing the total to 140 features) over 5-second, 33%-hop-size "texture windows", which are what comprise the mir_feature_dictionary. 128-D VGGish feature embeddings were extracted at 0.96 Hz, then resampled to 1 Hz, comprising the vggish_feature_dictionary.

Both the MIR feature dictionary and VGGish feature dictionary have the same structure for ease of use. The structure is as follows:

* Film name (e.g. "avengers_endgame")
    * Cue number (e.g. 0-9 for a film with 10 cues)
        * Each cue is a 2D numpy array, with rows corresponding to the timestep (1 sec windows with 100% hop size for VGGish, 5 sec windows with 33% hop size for MIR features) and columns referring to the features

# %% [code]
import numpy as np

mir_features = np.load('mir_features_dictionary.npy', allow_pickle = True).item()
vggish_features = np.load('vggish_features_dictionary.npy', allow_pickle = True).item()

# %% [code]
film = "avengers_endgame"
cue_number = 3
print("There are {} films.".format(len(mir_features)))
print("Film '{}' has {} cues.".format(film, len(mir_features[film])))
print("Cue {} of film '{}' is a 2-D Numpy array of shape {}.".format(
    cue_number,
    film,
    mir_features[film][cue_number].shape
))

# %% [markdown]
##### MIR index to feature correspondence
The ordering in the "mir_feature_names.csv" file corresponds to the ordering in "mir_features_dictionary.npy". There are 140 total features.

# %% [code]
# Import feature names
import csv

with open("mir_feature_names.csv", "r") as f:
    reader = csv.reader(f, delimiter='\t')
    for row in reader:
        feature_names = row # there should only be one row

# %% [code]
print("There are {} MIR features.".format(len(feature_names)))
feat_num = 0
print("Feature {} is '{}'.".format(feat_num, feature_names[feat_num]))

# %% [markdown]
#### Low-level visual features
Unlike the feature dictionaries above, each film has its own "contrast" and "brightness" Numpy file. Each file describes the values of the given feature, sampled in the first of every 24 frames (with the movies being at 24fps, this equates to a 1Hz samplerate.) The values are given as a 1D array and range from 0.0 to 1.0, inclusive.

# %% [code]
import numpy as np

film = "avengers_endgame"
brightness = np.load("low_level_visual_data/{}_brightness.npy".format(film))
contrast = np.load("low_level_visual_data/{}_contrast.npy".format(film))

# %% [code]
assert brightness.shape == contrast.shape, "brightness and contrast for a single film are both sampled at 1Hz \
    and should have the same array length"
print("Number of brightness values in '{}': {}".format(film, brightness.shape))
print("Sample brightness values:", brightness[1000:1005])

# %% [code]
