# Supplementary material for: A computational lens into how music characterizes genre in film
Source: PLoS One. 2021 Apr 8;16(4):e0249957. doi: 10.1371/journal.pone.0249957 (PMC8031455; doi:10.1371/journal.pone.0249957)
Supplement: S1 Data — (ZIP) [file pone.0249957.s004.zip › film_genre_master_list.csv]

first_man	biography,drama,history	drama
happy_death_day	horror,mystery,thriller	horror
johnny_english_strikes_again	action,adventure,comedy	action,comedy
krampus	comedy,drama,fantasy,horror	comedy,drama,horror
mortal_engines	action,adventure,fantasy,sci-fi,thriller	action,sci-fi
house_with_a_clock_in_its_walls	comedy,family,fantasy,horror,sci-fi	comedy,horror,sci-fi
paddington_2	adventure,comedy,family,fantasy	comedy
antman	action,adventure,comedy,sci-fi	action,comedy,sci-fi
antman_and_the_wasp	action,adventure,comedy,sci-fi	action,comedy,sci-fi
avengers_age_of_ultron	action,adventure,sci-fi	action,sci-fi
avengers_infinity_war	action,adventure,sci-fi	action,sci-fi
bohemian_rhapsody	biography,drama,music	drama
captain_america_civil_war	action,adventure,sci-fi	action,sci-fi
captain_america_the_winter_soldier	action,adventure,sci-fi	action,sci-fi
doctor_strange	action,adventure,fantasy,sci-fi	action,sci-fi
thor_ragnarok	action,adventure,comedy,fantasy,sci-fi	action,comedy,sci-fi
spotlight	biography,crime,drama	drama
hitman_agent_47	action,crime,thriller	action
kingsman_the_secret_service	action,adventure,comedy,thriller	action,comedy
miss_peregrines_home_for_peculiar_children	adventure,drama,fantasy,thriller	drama
mission_impossible_fallout	action,adventure,thriller	action
mission_impossible_rogue_nation	action,adventure,thriller	action
moonlight	drama	drama
the_boy	horror,mystery,thriller	horror
megan_leavey	biography,drama,war	drama
jumanji_welcome_to_the_jungle	action,adventure,comedy,fantasy	action,comedy
jupiter_ascending	action,adventure,sci-fi	action,sci-fi
murder_on_the_orient_express	crime,drama,mystery	drama
the_imitation_game	biography,drama,thriller,war	drama
the_post	biography,drama,history,thriller	drama
venom	action,sci-fi,thriller	action,sci-fi
chappaquiddick	drama,history,thriller	drama
need_for_speed	action,crime,thriller	action
sicario	action,crime,drama,mystery,thriller	action,drama
star_trek_beyond	action,adventure,sci-fi,thriller	action,sci-fi
sully	biography,drama	drama
beauty_and_the_beast	family,fantasy,musical,romance	romance
christopher_robin	adventure,comedy,drama,family,fantasy	comedy,drama
cinderella	drama,family,fantasy,romance	drama,romance
incredibles_2	animation,action,adventure,comedy,family,sci-fi	action,comedy,sci-fi
into_the_woods	adventure,comedy,drama,fantasy,musical	comedy,drama
maleficent	action,adventure,family,fantasy,romance	action,romance
pirates_of_the_caribbean_dead_men_tell_no_tales	action,adventure,fantasy	action
queen_of_katwe	biography,drama,sport	drama
solo_a_star_wars_story	action,adventure,sci-fi	action,sci-fi
star_wars_the_force_awakens	action,adventure,sci-fi	action,sci-fi
star_wars_the_last_jedi	action,adventure,fantasy,sci-fi	action,sci-fi
tomorrowland	action,adventure,family,fantasy,mystery,sci-fi	action,sci-fi
300_rise_of_an_empire	action,drama	action,drama
annabelle	horror,mystery,thriller	horror
aquaman	action,adventure,fantasy,sci-fi	action,sci-fi
black_mass	biography,crime,drama	drama
blended	comedy,romance	comedy,romance
collateral_beauty	drama,romance	drama,romance
crazy_rich_asians	comedy,drama,romance	comedy,drama,romance
creed	drama,sport	drama
dumb_and_dumber_to	comedy	comedy
dunkirk	action,drama,history,thriller,war	action,drama
edge_of_tomorrow	action,sci-fi	action,sci-fi
entourage	comedy,drama	comedy,drama
focus	comedy,crime,drama,romance	comedy,drama,romance
geostorm	action,sci-fi,thriller	action,sci-fi
going_in_style	comedy,crime	comedy
horrible_bosses_2	comedy,crime	comedy
how_to_be_single	comedy,drama,romance	comedy,drama,romance
in_the_heart_of_the_sea	action,adventure,biography,drama,history	action,drama
interstellar	adventure,drama,sci-fi	drama,sci-fi
justice_league	action,adventure,fantasy,sci-fi	action,sci-fi
king_arthur_legend_of_the_sword	action,adventure,drama,fantasy	action,drama
kong_skull_island	action,adventure,fantasy,sci-fi	action,sci-fi
lights_out	drama,horror,mystery,thriller	drama,horror
mad_max_fury_road	action,adventure,sci-fi,thriller	action,sci-fi
magic_mike_xxl	comedy,drama,music	comedy,drama
me_before_you	drama,romance	drama,romance
oceans_8	action,comedy,crime,thriller	action,comedy
pan	adventure,comedy,family,fantasy	comedy
rampage	action,adventure,sci-fi	action,sci-fi
ready_player_one	action,adventure,sci-fi	action,sci-fi
run_all_night	action,crime,drama,thriller	action,drama
san_andreas	action,adventure,drama,thriller	action,drama
smallfoot	animation,adventure,comedy,family,fantasy,musical	comedy
suicide_squad	action,adventure,fantasy,sci-fi	action,sci-fi
tammy	comedy,romance	comedy,romance
teen_titans_go_to_the_movies	animation,action,adventure,comedy,family,musical,sci-fi	action,comedy,sci-fi
the_conjuring_2	horror,mystery,thriller	horror
the_intern	comedy,drama	comedy,drama
the_judge	crime,drama	drama
the_legend_of_tarzan	action,adventure,drama,fantasy,romance	action,drama,romance
the_man_from_uncle	action,adventure,comedy	action,comedy
the_meg	action,horror,sci-fi,thriller	action,horror,sci-fi
this_is_where_i_leave_you	comedy,drama	comedy,drama
transcendence	drama,sci-fi,thriller	drama,sci-fi
vacation	adventure,comedy	comedy
wonder_woman	action,adventure,fantasy,sci-fi,war	action,sci-fi
halloween_2018	horror,thriller	horror
aladdin	romance	romance
alita_battle_angel	action,sci-fi	action,sci-fi
avengers_endgame	action,drama,sci-fi	action,drama,sci-fi
captain_marvel	action,sci-fi	action,sci-fi
dora_and_the_lost_city_of_gold	comedy	comedy
it_chapter_two	drama,horror	drama,horror
parasite	comedy,drama	comedy,drama
pet_sematary	horror	horror
pokemon_detective_pikachu	action,comedy,sci-fi	action,comedy,sci-fi
rambo_last_blood	action	action
shazam	action,comedy	action,comedy
stuber	action,comedy	action,comedy
the_hustle	comedy	comedy
the_peanut_butter_falcon	comedy,drama	comedy,drama
tolkien	drama,romance	drama,romance
