# Supplementary material for: A computational lens into how music characterizes genre in film
Source: PLoS One. 2021 Apr 8;16(4):e0249957. doi: 10.1371/journal.pone.0249957 (PMC8031455; doi:10.1371/journal.pone.0249957)
Supplement: S1 Data — (ZIP) [file pone.0249957.s004.zip › mir_feature_names.csv]

mfcc1_mean	mfcc1_stddev	mfcc2_mean	mfcc2_stddev	mfcc3_mean	mfcc3_stddev	mfcc4_mean	mfcc4_stddev	mfcc5_mean	mfcc5_stddev	mfcc6_mean	mfcc6_stddev	mfcc7_mean	mfcc7_stddev	mfcc8_mean	mfcc8_stddev	mfcc9_mean	mfcc9_stddev	mfcc10_mean	mfcc10_stddev	mfcc11_mean	mfcc11_stddev	mfcc12_mean	mfcc12_stddev	mfcc13_mean	mfcc13_stddev	deltamfcc1_mean	deltamfcc1_stddev	deltamfcc2_mean	deltamfcc2_stddev	deltamfcc3_mean	deltamfcc3_stddev	deltamfcc4_mean	deltamfcc4_stddev	deltamfcc5_mean	deltamfcc5_stddev	deltamfcc6_mean	deltamfcc6_stddev	deltamfcc7_mean	deltamfcc7_stddev	deltamfcc8_mean	deltamfcc8_stddev	deltamfcc9_mean	deltamfcc9_stddev	deltamfcc10_mean	deltamfcc10_stddev	deltamfcc11_mean	deltamfcc11_stddev	deltamfcc12_mean	deltamfcc12_stddev
[truncated: 90 more columns]
