# Supplementary material for: A computational lens into how music characterizes genre in film
Source: PLoS One. 2021 Apr 8;16(4):e0249957. doi: 10.1371/journal.pone.0249957 (PMC8031455; doi:10.1371/journal.pone.0249957)
Supplement: S1 Data — (ZIP) [file pone.0249957.s004.zip › README.txt]

"film_genre_master_list.csv" contains a list of all 110 films and their genres.

"mir_feature_names.csv" contains an ordered list of the 140 MIR features used in the study.

"mir_features_dictionary.npy" contains all of the processed MIR features for each film.

"vggish_features_dictionary.npy" contains all of the processed VGGish feature embeddings for each film.

"low_level_visual_data" contains brightness and contrast visual data for each film.

For more details on all data, and examples of how to access all the data, see "data_explorer_example.ipynb".
