# Supplementary material for: A computational lens into how music characterizes genre in film
Source: PLOS journal article supplement (doi:10.1371/journal.pone.0249957), 2021-04-08
Supplement: S4 (10.1371/journal.pone.0249957.s004) [file journal.pone.0249957.s004]

### 110-film corpus summary

| Title                               | Genre Tags             |
|-------------------------------------|------------------------|
| 300: Rise of an Empire              | Action, Drama          |
| Aladdin (2019)                      | Romance                |
| Alita: Battle Angel                 | Action, Sci-Fi         |
| Annabelle                           | Horror                 |
| Ant-Man                             | Action, Comedy, Sci-Fi |
| Ant-Man and the Wasp                | Action, Comedy, Sci-Fi |
| Aquaman (2018)                      | Action, Sci-Fi         |
| Avengers: Age of Ultron             | Action, Sci-Fi         |
| Avengers: Endgame                   | Action, Drama, Sci-Fi  |
| Avengers: Infinity War              | Action, Sci-Fi         |
| Beauty and the Beast (2017)         | Romance                |
| Black Mass                          | Drama                  |
| Blended                             | Comedy, Romance        |
| Bohemian Rhapsody                   | Drama                  |
| Captain America: Civil War          | Action, Sci-Fi         |
| Captain America: The Winter Soldier | Action, Sci-Fi         |
| Captain Marvel                      | Action, Sci-Fi         |
| Chappaquiddick                      | Drama                  |
| Christopher Robin                   | Comedy, Drama          |
| Cinderella (2015)                   | Drama, Romance         |
| Collateral Beauty                   | Drama, Romance         |
| Crazy Rich Asians                   | Comedy, Drama, Romance |
| Creed                               | Drama                  |
| Doctor Strange                      | Action, Sci-Fi         |
| Dora and the Lost City of Gold      | Comedy                 |
| Dumb and Dumber To                  | Comedy                 |
| Dunkirk                             | Action, Drama          |
| Edge of Tomorrow                    | Action, Sci-Fi         |
| Entourage                           | Comedy, Drama          |
| First Man                           | Drama                  |
| Focus (2015)                        | Comedy, Drama, Romance |
| Geostorm                            | Action, Sci-Fi         |
| Going in Style                      | Comedy                 |
| Halloween (2018)                    | Horror                 |
| Happy Death Day                     | Horror                 |
| Hitman: Agent 47                    | Action                 |
| Horrible Bosses 2                   | Comedy                 |
| How to be Single                    | Comedy, Drama, Romance |
| In the Heart of the Sea             | Action, Drama          |
| Incredibles 2                       | Action, Comedy, Sci-Fi |
| Interstellar                        | Drama, Sci-Fi          |
| Into the Woods (2014)               | Comedy, Drama          |
| It Chapter 2                        | Drama, Horror          |
| Johnny English Strikes Again        | Action, Comedy         |
| Jumanji: Welcome to the Jungle      | Action, Comedy         |
| Jupiter Ascending                   | Action, Sci-Fi         |
| Justice League                      | Action, Sci-Fi         |
| King Arthur: Legend of the Sword    | Action, Drama          |
| Kingsman: The Secret Service        | Action, Comedy         |
| Kong: Skull Island                  | Action, Sci-Fi         |
| Krampus                             | Comedy, Drama, Horror  |
| Lights Out (2016)                   | Drama, Horror          |
| Mad Max Fury Road                   | Action, Sci-Fi         |

|                                                  |                        |
|--------------------------------------------------|------------------------|
| Magic Mike XXL                                   | Comedy, Drama          |
| Maleficent                                       | Action, Romance        |
| Me Before You                                    | Drama, Romance         |
| Megan Leavey                                     | Drama                  |
| Miss Peregrine's Home for Peculiar Children      | Drama                  |
| Mission: Impossible - Fallout                    | Action                 |
| Mission: Impossible - Rogue Nation               | Action                 |
| Moonlight                                        | Drama                  |
| Mortal Engines                                   | Action, Sci-Fi         |
| Murder on the Orient Express                     | Drama                  |
| Need for Speed                                   | Action                 |
| Oceans 8                                         | Action, Comedy         |
| Paddington 2                                     | Comedy                 |
| Pan                                              | Comedy                 |
| Parasite                                         | Comedy, Drama          |
| Pet Semetary                                     | Horror                 |
| Pirates of the Caribbean: Dead Men Tell No Tales | Action                 |
| Pokemon Detective Pikachu                        | Action, Comedy, Sci-Fi |
| Queen of Katwe                                   | Drama                  |
| Rambo: Last Blood                                | Action                 |
| Rampage                                          | Action, Sci-Fi         |
| Ready Player One                                 | Action, Sci-Fi         |
| Run All Night                                    | Action, Drama          |
| San Andreas                                      | Action, Drama          |
| Shazam!                                          | Action, Comedy         |
| Sicario                                          | Action, Drama          |
| Smallfoot                                        | Comedy                 |
| Solo: A Star Wars Story                          | Action, Sci-Fi         |
| Spotlight                                        | Drama                  |
| Star Trek Beyond                                 | Action, Sci-Fi         |
| Star Wars: The Force Awakens                     | Action, Sci-Fi         |
| Star Wars: The Last Jedi                         | Action, Sci-Fi         |
| Stuber                                           | Action, Comedy         |
| Suicide Squad                                    | Action, Sci-Fi         |
| Sully                                            | Drama                  |
| Tammy                                            | Comedy, Romance        |
| Teen Titans Go! To the Movies                    | Action, Comedy, Sci-Fi |
| The Boy                                          | Horror                 |
| The Conjuring 2                                  | Horror                 |
| The House with a Clock in Its Walls              | Comedy, Horror, Sci-Fi |
| The Hustle (2019)                                | Comedy                 |
| The Imitation Game                               | Drama                  |
| The Intern                                       | Comedy, Drama          |
| The Judge                                        | Drama                  |
| The Legend of Tarzan                             | Action, Drama, Romance |
| The Man from U.N.C.L.E.                          | Action, Comedy         |
| The Meg                                          | Action, Horror, Sci-Fi |
| The Peanut Butter Falcon                         | Comedy, Drama          |
| The Post                                         | Drama                  |
| This Is Where I Leave You                        | Comedy, Drama          |
| Thor Ragnarok                                    | Action, Comedy, Sci-Fi |
| Tolkien                                          | Drama, Romance         |
| Tomorrowland                                     | Action, Sci-Fi         |
| Transcendence                                    | Drama, Sci-Fi          |
| Vacation                                         | Comedy                 |
| Venom                                            | Action, Sci-Fi         |

|              |                |
|--------------|----------------|
| Wonder Woman | Action, Sci-Fi |
|--------------|----------------|
